# Supplementary material for: Enhancing the Production of the Fungal Pigment Aurofusarin in Fusarium graminearum
Source: PubMed Central journal article supplement (PMC6266765; doi:10.3390/toxins10110485), 2018-11-21
Supplement: toxins-10-00485-s001.pdf [file toxins-10-00485-s001.pdf]

# Supplementary Materials: Enhancing the Production of the Fungal Pigment Aurofusarin in *Fusarium graminearum*

Klaus Ringsborg Westphal, Rasmus Dam Wollenberg, Florian-Alexander Herbst, Jens Laurids Sørensen, Teis Esben Sondergaard and Reinhard Wimmer

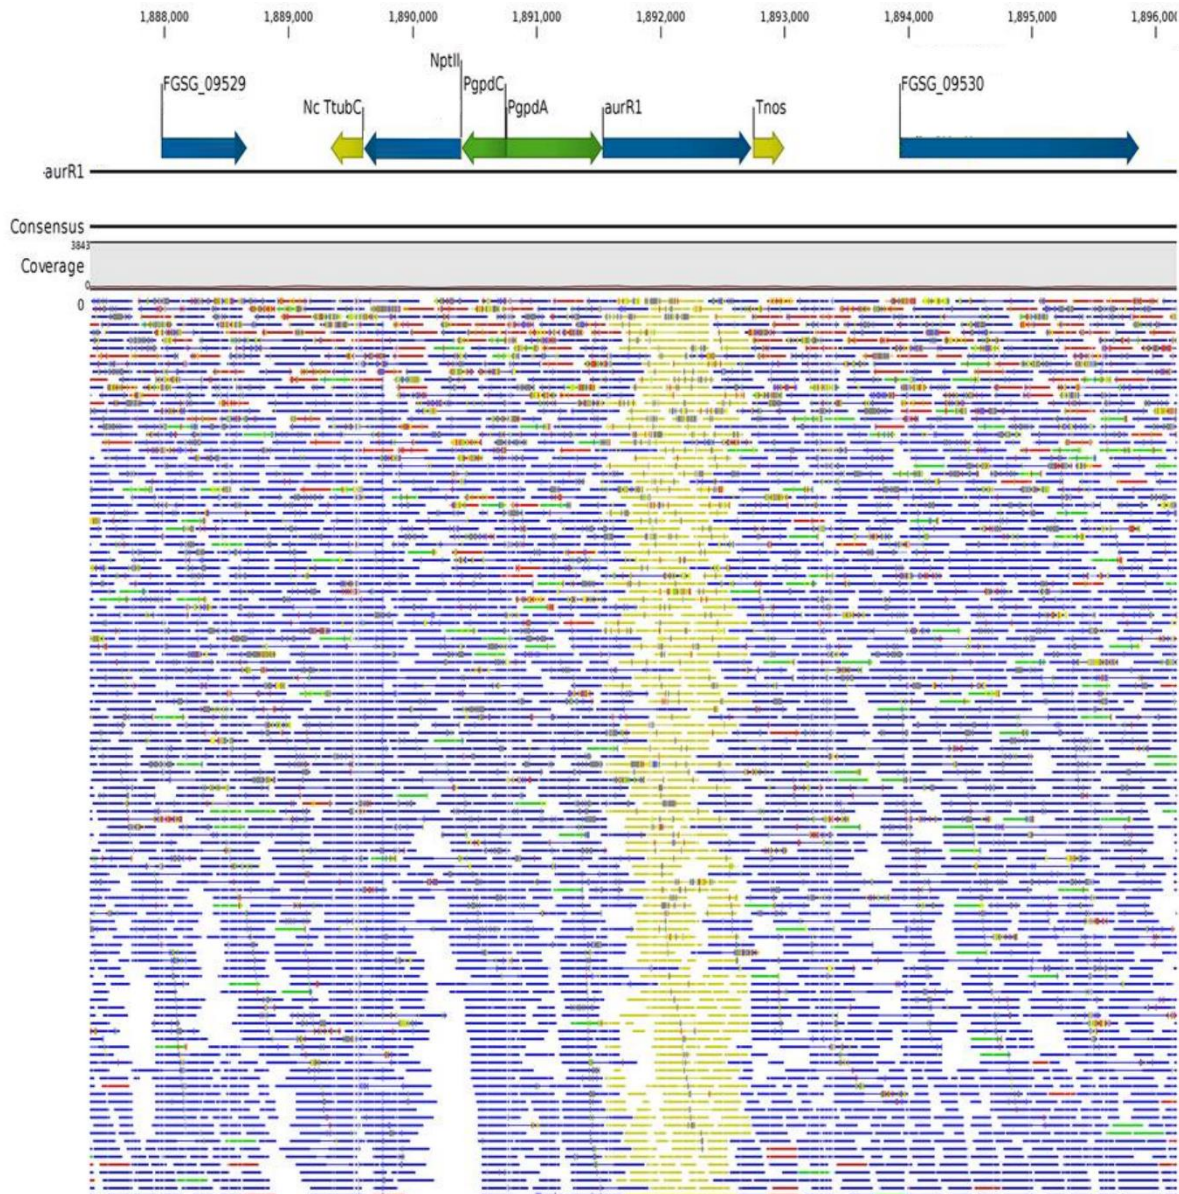

**Figure S1.** Sequencing results for the OE::*aurR1* mutant. (**Top**) *In silico* annotations at the tubulin locus of *Fusarium graminearum* with inserted resistance gene (*nptII*) and *aurR1*. Green, yellow, and blue annotations indicate promoters, terminators, and genes, respectively. (**Bottom**) Read-mappings from full genome sequencing represented as either paired-end (blue), sense strand (green), anti-sense strand (red), or mapped to other places in the genome (yellow).

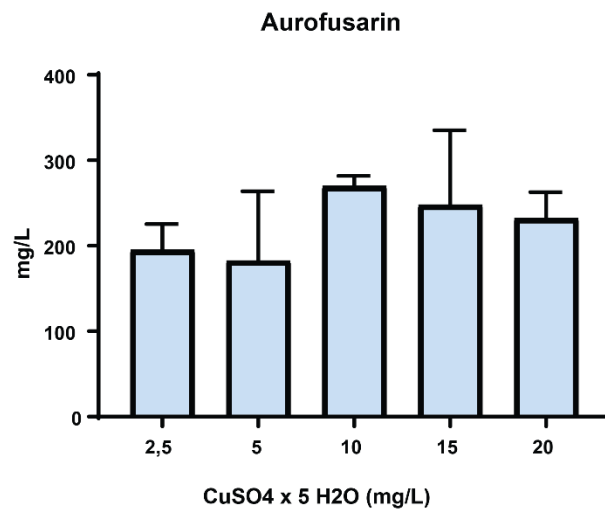

**Figure S2.** Production of aurofusarin in the OE::*aurR1* mutant in response to variable concentrations of  $\text{CuSO}_4 \times 5 \text{H}_2\text{O}$  in the growth medium. The bars represent mean values from four replicates with error bars showing the standard deviation.
